# Supplementary material for: Hollow Hafnium Oxide (HfO2) Fibers: Using an Effective Combination of Sol–Gel, Electrospinning, and Thermal Degradation Pathway
Source: PubMed Central journal article supplement (PMC10919084; doi:10.1021/acs.langmuir.3c03484), 2024-02-20
Supplement: la3c03484_si_001.pdf [file la3c03484_si_001.pdf]

# Supporting Information

## Hollow Hafnium Oxide (HfO<sub>2</sub>) Fibers: Using an Effective Combination of Sol-Gel, Electrospinning, and Thermal Degradation Pathway

Meng-Ru Huang,<sup>1,†</sup> Yi-Fan Chen,<sup>1,†</sup> Bhaskarchand Gautam,<sup>1</sup> Yen-Shen Hsu,<sup>1</sup> Jhih-Hao Ho,<sup>1</sup> Hsun-Hao Hsu,<sup>1</sup> and Jiun-Tai Chen<sup>1,2\*</sup>

<sup>1</sup>Department of Applied Chemistry, National Yang Ming Chiao Tung University, Taiwan 300093

<sup>2</sup>Center for Emergent Functional Matter Science, National Yang Ming Chiao Tung University, Taiwan 300093

<sup>†</sup>Meng-Ru Huang and Yi-Fan Chen contributed equally to this work.

### TABLE OF CONTENTS

|                                                                                         |     |
|-----------------------------------------------------------------------------------------|-----|
| 1. DLS experiments for different storage times with different sol-gel solvents          | S-2 |
| 2. HfO <sub>2</sub> thicknesses in different temperatures                               | S-3 |
| 3. HfO <sub>2</sub> thicknesses at different molar ratios                               | S-4 |
| 4. Hollow HfO <sub>2</sub> fibers prepared with different solvents                      | S-5 |
| 5. XPS data of the HfO <sub>2</sub> coated PS fibers and HfO <sub>2</sub> hollow fibers | S-6 |

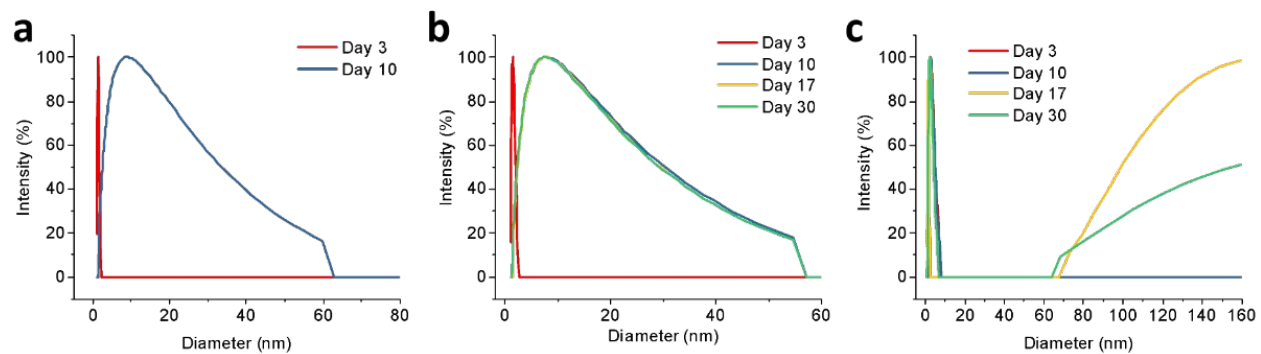

**Figure S1.** DLS experiments for different storage times with different sol-gel solvents: (a) ethanol at room temperature, (b) ethanol kept at 5 °C, and (c) PGME at room temperature.

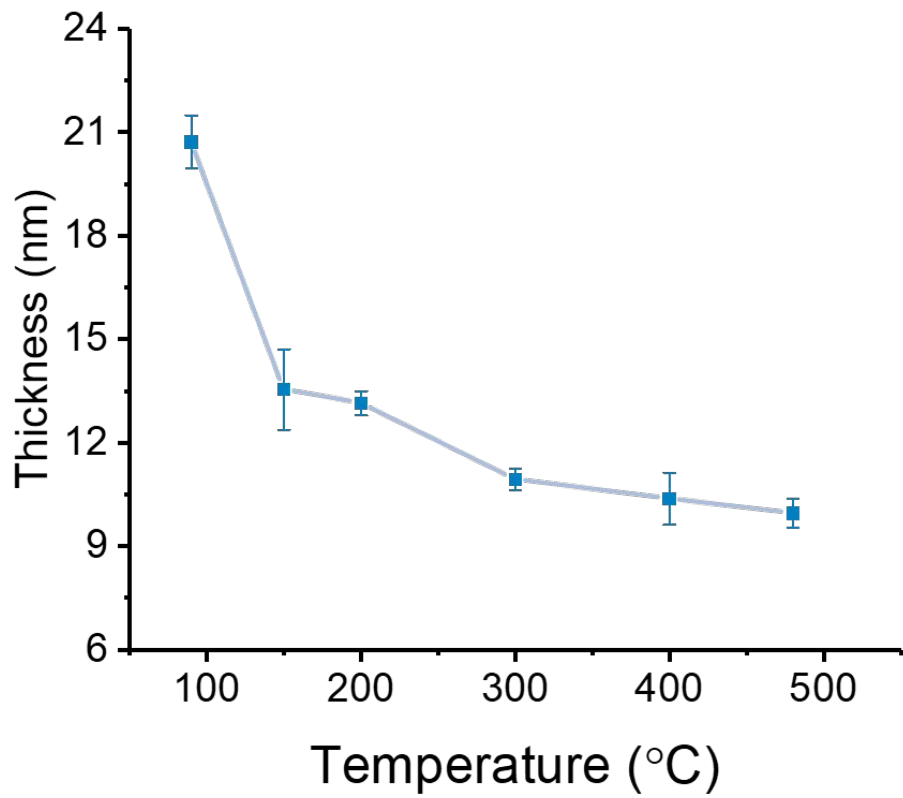

**Figure S2.** HfO<sub>2</sub> thicknesses in different temperatures on silicon wafers.

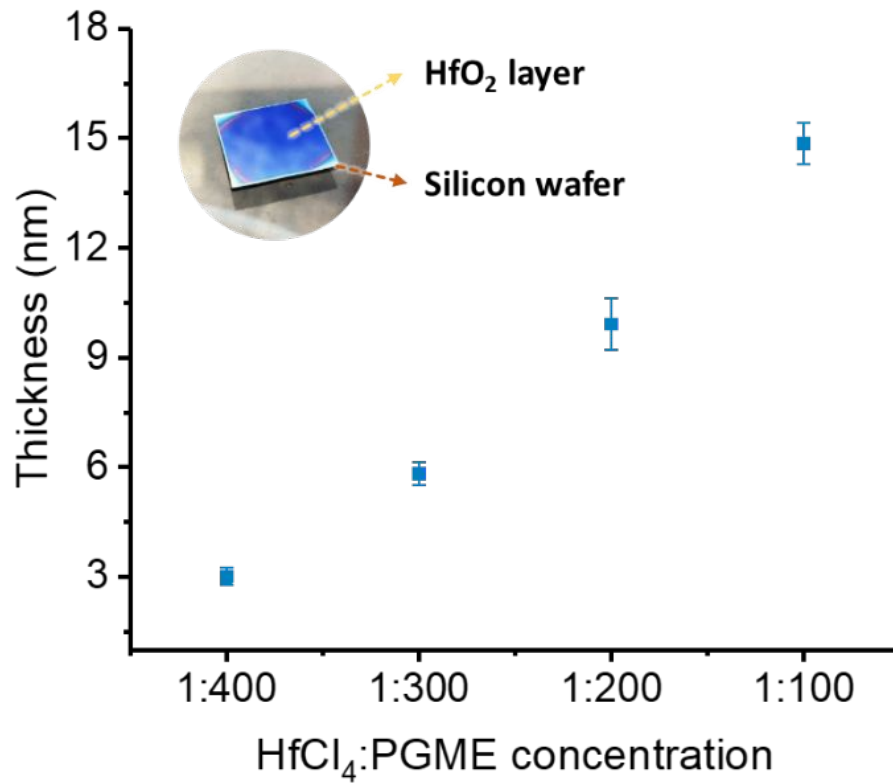

**Figure S3.** HfO<sub>2</sub> thicknesses at different molar ratios on silicon wafers.

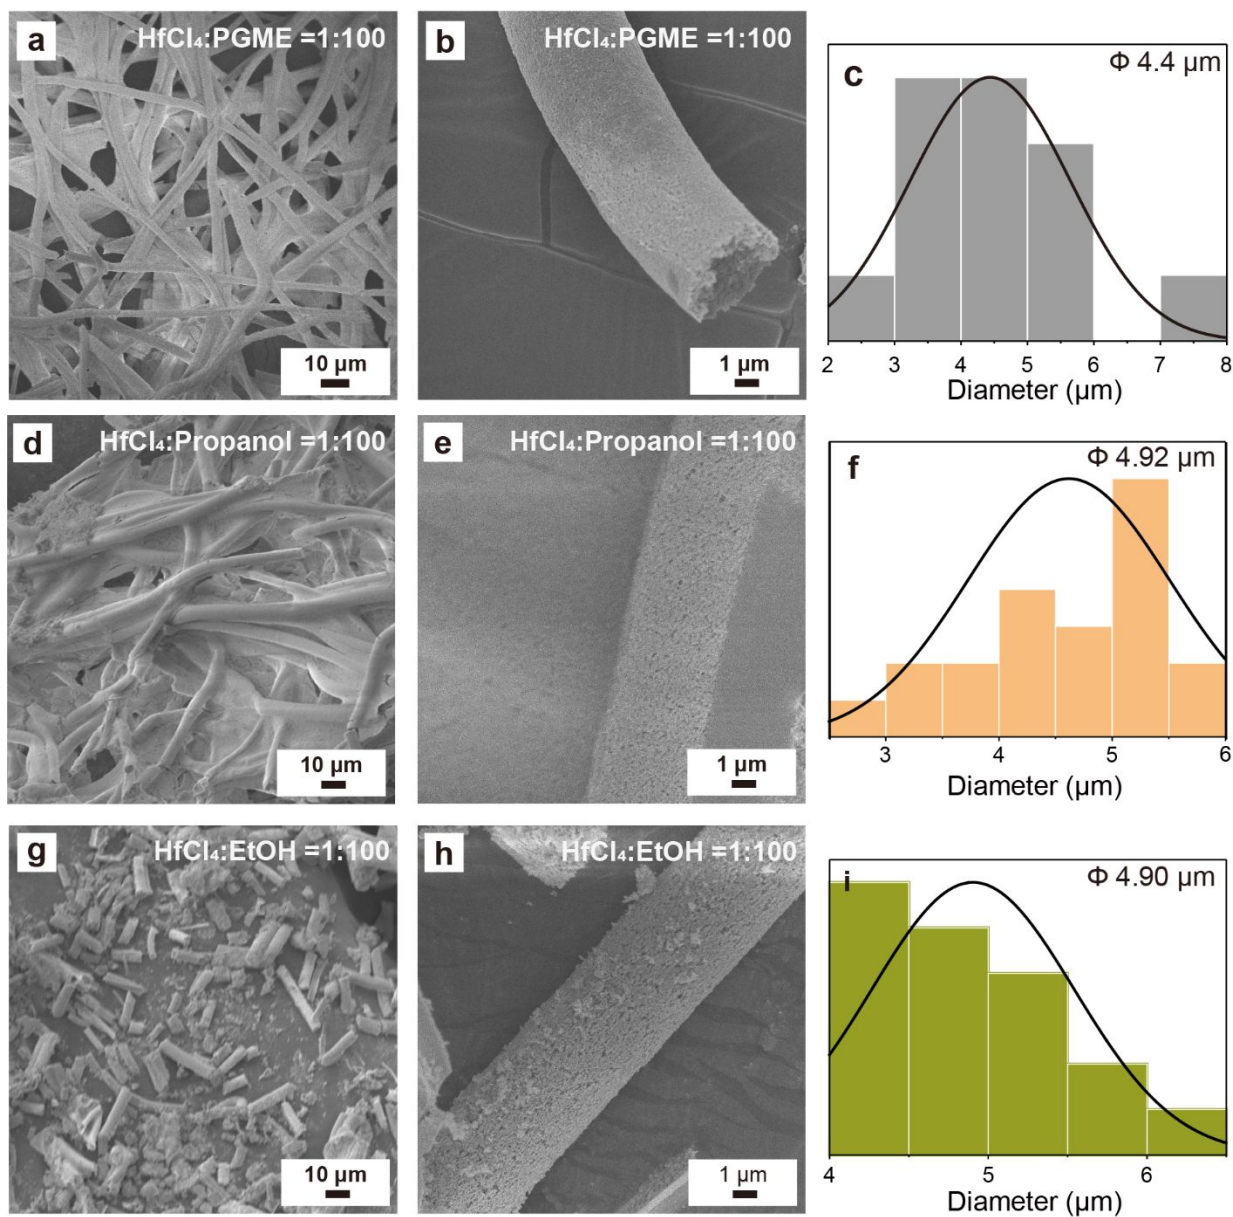

**Figure S4.** Hollow  $\text{HfO}_2$  fibers prepared with different solvents. (a-c) PGME: (a,b) SEM images and (c) fiber diameter distribution. (d-f) Propanol: (d,e) SEM images and (f) fiber diameter distribution. (g-i) Ethanol: (g,h) SEM images and (i) fiber diameter distribution.

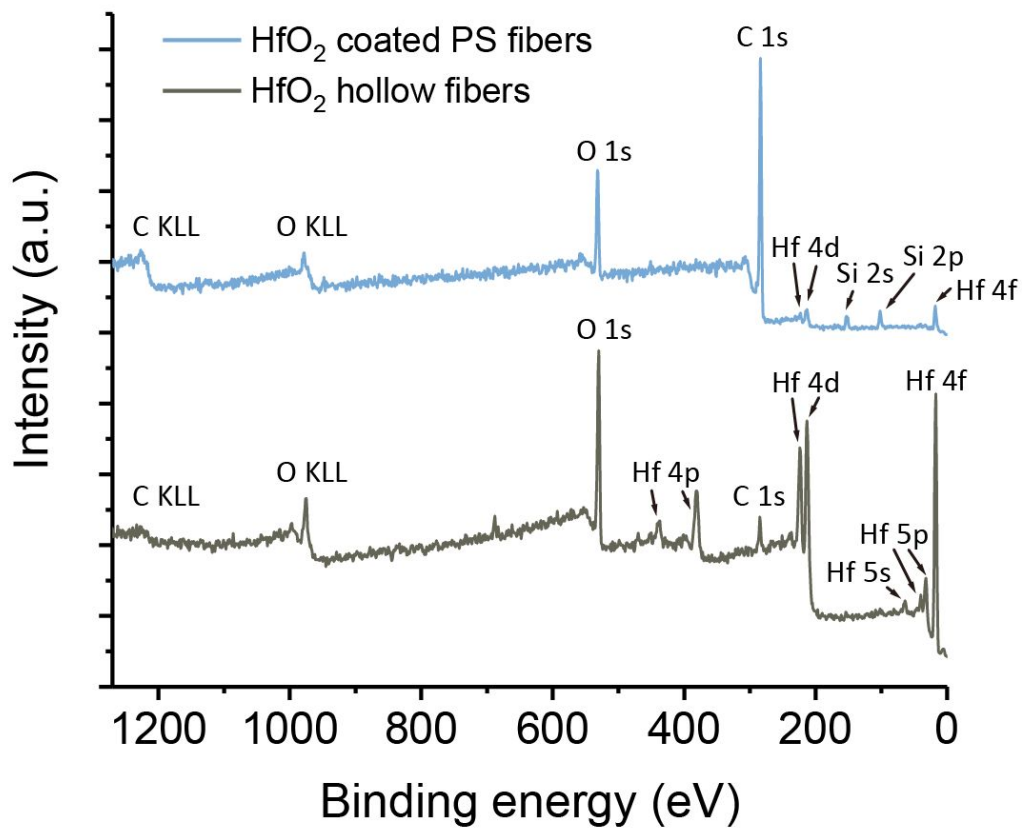

**Figure S5.** XPS data of the HfO<sub>2</sub> coated PS fibers and HfO<sub>2</sub> hollow fibers.
